# Supplementary material for: Pattern and determinants of alcohol and tobacco co-use and its relationship with smoking cessation in Hong Kong
Source: PubMed Central journal article supplement — Tob Prev Cessat. 2021 Mar 24;7:21. doi: 10.18332/tpc/132288 (PMC7989697; doi:10.18332/tpc/132288), 2021-03-24
Supplement: TPC-7-22-s1.pdf [file TPC-7-22-s1.pdf]

**Supplementary Table 1. Shapiro-Francia normality test results for continuous variables**

| <b>Variables</b>        | <b><sup>1</sup>W'</b> | <b><sup>2</sup>V'</b> | <b>z</b> | <b>Prob&gt;z</b> |
|-------------------------|-----------------------|-----------------------|----------|------------------|
| Age                     | 0.98206               | 74.865                | 11.189   | 0.00001          |
| Cigarette use per day   | 0.93209               | 283.373               | 14.639   | 0.00001          |
| Fagerström score        | 0.99229               | 32.175                | 8.999    | 0.00001          |
| Importance              | 0.97859               | 87.983                | 11.595   | 0.00001          |
| Difficulty              | 0.82989               | 699.568               | 16.966   | 0.00001          |
| Confident               | 0.92114               | 324.096               | 14.973   | 0.00001          |
| Number of quit attempts | 0.39838               | 2501.883              | 20.282   | 0.00001          |

<sup>1</sup> Shapiro-Francia test statistics. <sup>2</sup> Indices for departure from normality.
